# Supplementary material for: Effect of Microbial Status on Hepatic Odd-Chain Fatty Acids Is Diet-Dependent
Source: MDPI journal article supplement (doi:10.3390/nu13051546), 2021-05-04
Supplement: s1 [file s1]

## Supplementary Files

**Table S1.** Oligonucleotides used in these studies to measure mRNA levels.

| Primer name |   | Primer sequence (5'→3')                 |
|-------------|---|-----------------------------------------|
| Hprt        | f | GTT GAA GAT ATA ATT GAC ACT GGT AAA ACA |
|             | r | AGC TTG CAA CCT TAA CCA TTT TG          |
| Actin       | f | GCC AAC CGT GAA AAG AGA C               |
|             | r | TAC GAC CAG AGG CAT ACA G               |
| Rpl13a      | f | AGC AGA TCT TGA GGT TAC GGA             |
|             | r | TTA TTG GGT TCA CAC CAG GA              |
| Cd36        | f | CCA AGC TAT TGC GAC ATG AT              |
|             | r | ACA GCG TAG ATA GAC CTG CAA A           |
| Acss2       | f | TGT GTG ATG GGC CAT ACC TTC             |
|             | r | GTA GTC TGG TGT GGC AAT GG              |
| Acss3       | f | ACC AGG AAG GAA GGT GGA GT              |
|             | r | AAC TCT GTC TGG CCT GTG CT              |
| Fasn        | f | TTG ATG ATT CAG GGA GTG GA              |
|             | r | TTA CAC CTT GCT CCT TGC TG              |
| Elovl6      | f | TGC AGG AAA ACT GGA AGA AGT CT          |
|             | r | AGC GGC TTC CGA AGT TCA A               |
| Scd1        | f | TTC TTC TCT CAC GTG GGT TG              |
|             | r | CGG GCT TGT AGT ACC TCC TC              |
| Ppara       | f | ATT CGG CTG AAG CTG GTG TA              |
|             | r | AAG CGA ATT GCA TTG TGT GA              |
| Hsd1        | f | ACA GGC TTG ATG CAG GTT CT              |
|             | r | CCA CTT CCA TGC CAG AAA AT              |
| Ffar1       | f | GGC CCT ATA ATG CCT CCA AT              |
|             | r | CCC TGT GAT GAG TCC CAA CT              |
| Ffar2       | f | CTT CCC GGT GCA GTA CAA GT              |
|             | r | GCT CTT GGG TGA AGT TCT CG              |
| Ffar3       | f | TCC TCA GCA CCC TCA ACT CT              |
|             | r | CTA GCT CGG ACA CTC CTT GG              |
| Mct1        | f | TGT TAG TCG GAG CCT TCA TTT C           |

|        |   |                                |
|--------|---|--------------------------------|
|        | r | CAC TGG TCG TTG CAC TGA ATA    |
| sMct1  | f | CCA CTT CTG GGC TTG TTT TC     |
|        | r | CAG ACC AGT GAG TGC TCC AA     |
| Mct4   | f | CTG AGG CAC GAG CAA GAG TA     |
|        | r | GGC TGC TTT CAC CAA GAA CTG    |
| Mct5   | f | CCA TTA TGT CAT CAC TCC GTT TC |
|        | r | CTC TCC AAG TAC GTC ACA GAT GA |
| G6pase | f | ACG TAT GGA TTC CGG TGT TT     |
|        | r | GGT AGA TCC GGG ACA GAC AG     |
